# Coculture of THP-1 Human Mononuclear Cells with *Candida albicans* Results in Pronounced Changes in Host Gene Expression

Katherine S. Barker,<sup>1,4</sup> Teresa Liu,<sup>2,4</sup> and P. David Rogers<sup>1,2,3,4</sup>

Departments of <sup>1</sup>Pharmacy and <sup>2</sup>Pharmaceutical Sciences, College of Pharmacy, and <sup>3</sup>Department of Pediatrics, College of Medicine, University of Tennessee Health Science Center, and <sup>4</sup>Children's Foundation Research Center, Le Bonheur Children's Medical Center, Memphis, Tennessee

**Background.** The host's first line of defense against bloodstream infection with *Candida albicans* involves the recognition and clearance of the fungus by neutrophils and monocytes/macrophages. The purpose of the present study was to examine changes in the monocytic cell gene-expression profile in response to *C. albicans* stimulation.

**Methods.** RNA was isolated from THP-1 cells 3 h after coculture with live *C. albicans* SC5314 cells. After hybridization to microarrays, genes differentially expressed by at least 2.0-fold were included in the final data set.

**Results.** As expected, *TNFA*, *IL8*, *CD83*, *MIP1A*, and *MIP1B* were among the genes up-regulated. This was confirmed by real-time reverse-transcriptase polymerase chain reaction (RT-PCR), fluorescence-activated cell sorting analysis, and enzyme-linked immunosorbent assay. Furthermore, *RGS1*, *RGS2*, *RGS16*, *DSCR1*, *GROB*, *EGR3*, *FLT4*, and *TNFAIP6* were also up-regulated in response to *C. albicans*, whereas *CCR2* and *NCF2* were among the genes down-regulated in response to *C. albicans*. Differential expression of selected genes was confirmed at several time points by real-time RT-PCR.

**Conclusions.** This study defines the gene expression profile of an early response of human mononuclear cells to *C. albicans* and identifies genes not previously known to be responsive to this pathogen.

The human opportunistic pathogen *Candida albicans* causes superficial and disseminated disease in immunocompromised individuals. Superficial *C. albicans* infections occur most often in the oropharynx and vagina. Although not invasive or life threatening, oropharyngeal candidiasis is one of the most common infections in persons with HIV/AIDS. In contrast, disseminated candidiasis is deadly, accounting for the highest incidence of mortality (40%) of any cause of bloodstream infections [1], and it remains one of the leading causes of death in neutropenic patients with cancer [2].

Competent host response to disseminated candidia-

sis involves neutrophils and mononuclear phagocytes for recognition and clearing of fungal cells [3]. In addition to their role as phagocytic cells, both mononuclear phagocytes and neutrophils are capable of secreting immunomodulatory cytokines that influence the host immune response to fungal infection [4, 5]. *C. albicans*-stimulated monocytes, as well as stimulated CD4<sup>+</sup> and CD8<sup>+</sup> T cells and NK cells, produce macrophage inflammatory protein (MIP)-1 $\alpha$ , MIP-1 $\beta$ , and RANTES, which are responsible for chemoattraction of activated CD4<sup>+</sup> Th1 T cells, dendritic cells (DCs), and monocytes to the site of infection [6]. Additionally, monocytes produce interleukin (IL)-1 $\beta$ , tumor necrosis factor (TNF)- $\alpha$ , and IL-10 in response to *C. albicans* hyphae and produce IL-12 in response to *C. albicans* unable to form hyphae [7-9].

*C. albicans* interacts with monocytes through Toll-like receptors (TLRs) 2 and 4 [10], the integrin CD11b/CD18 [11], and the  $\beta$  glucan receptor dectin-1 [12]. Intracellularly, signaling involves at least mitogen-activated protein kinase and protein kinase C pathways to induce expression of host factors [13]. It remains unresolved whether other pathways, such as extracel-

Received 10 February 2005; accepted 30 March 2005; electronically published 20 July 2005.

Presented in part: 42nd Interscience Conference on Antimicrobial Agents and Chemotherapy, San Diego, CA, 27-30 September 2002 (poster M-207).

Potential conflicts of interest: none reported.

Financial support: Center of Genomics and Bioinformatics, University of Tennessee Health Science Center.

Reprints or correspondence: Dr. Katherine S. Barker, Children's Foundation Research Center, Le Bonheur Children's Medical Center, Room 304, West Patient Tower, 50 N. Dunlap St. Memphis, TN 38103 (ksbarker@utm.edu).

**The Journal of Infectious Diseases** 2005;192:901-12

© 2005 by the Infectious Diseases Society of America. All rights reserved. 0022-1899/2005/19205-0023\$15.00

lular-related kinases, are also involved in the production of factors such as chemokines in response to *C. albicans*.

The human monocytic cell line THP-1 affords a competent in vitro model of monocytes/macrophages during interaction with fungal cells. Previous studies have utilized THP-1 cells to examine human monocyte/macrophage chemokine production in response to whole fungal cells or fungal cell wall components [14, 15], phagocytosis of fungal cells [16], and differentiation and cell surface marker expression [17, 18]. THP-1 cells have proven advantageous in microarray analyses, since, in addition to their established usefulness as a monocyte/macrophage model, their homogeneous genetic background minimizes the amount of variability in the resulting gene expression profiles [19, 20]. Therefore, because of their established function as a model of peripheral blood mononuclear cells (PBMCs) and their attractiveness for use in microarray analysis, we chose to use THP-1 cells in an in vitro model of host monocyte–*C. albicans* interaction.

In the present study, to better explore the impact of *C. albicans* on host monocyte gene expression, we simultaneously examined the expression of ~18,400 human genes by use of microarray hybridization of RNA from THP-1 cells cocultured for 3 h with *C. albicans* strain SC5314. Further consideration was given to several genes with known involvement in the host response to *C. albicans*, by examining mRNA and protein expression during a span of 12 h in THP-1 cells cocultured with this fungus. In addition, several genes whose expression has never before been associated with the host response to *C. albicans* were examined during the time course by real-time reverse-transcriptase polymerase chain reaction (RT-PCR), to identify differential mRNA expression.

## MATERIALS AND METHODS

**Human cell line and *C. albicans* isolate.** The THP-1 human monocytic cell line (American Type Culture Collection) was used in this study. Cells were maintained in culture medium (RPMI 1640 and 10% fetal calf serum) at 37°C in a humidified chamber containing 5% CO<sub>2</sub>. SC5314 is a wild-type, virulent strain capable of producing hyphae. It was stored as a glycerol stock at –70°C and was grown in yeast nitrogen base broth containing 5% dextrose at 30°C in a shaking incubator.

**Coculture conditions.** Overnight fungal cultures were washed, resuspended in culture medium, and incubated in a shaking incubator for 3 h. THP-1 cells were also washed, counted using a hemacytometer, plated at  $2 \times 10^6$  cells/well, and allowed to equilibrate at 37°C for 3 h. After incubation, fungal cultures were washed, counted using a hemacytometer, and plated with THP-1 cells at a fungus-monocyte ratio of 3:10. This ratio was determined (data not shown) to preserve cell viability while providing suitable host gene response to known response genes, such as *TNFA*. Cocultures were incubated at 37°C in a CO<sub>2</sub>

incubator for 3 h (for microarray hybridization) or for 1–12 h (for subsequent analyses). After incubation, each coculture was examined by light microscopy; the majority of *C. albicans* cells had formed hyphae by 1 h, and many *C. albicans* cells were intracellular by 6 h. Viability of THP-1 cells was assessed by trypan blue exclusion ( $\geq 80\%$  viability was observed), supernatants were collected, and RNA was isolated from THP-1 cells. Supernatants from cocultures were tested using an E-TOXATE kit (Sigma Chemical) and contained  $<0.06$  EU/mL endotoxin. All experiments were performed in duplicate.

**Total RNA isolation.** Total RNA was isolated using Trizol reagent (Gibco/Invitrogen) in accordance with the manufacturer's instructions. RNA pellets were suspended in diethylpyrocarbonate-treated water and stored at –70°C. The integrity of RNA samples was assessed using an Agilent Bioanalyzer before microarray hybridization and by gel electrophoresis before real-time RT-PCR analysis.

**Microarray hybridization and data analysis.** Differential gene expression was measured by hybridizing Affymetrix U133A arrays and comparing normalized signals between THP-1 cells cultured in medium alone and those cultured with *C. albicans*. Two sets of hybridizations were performed using RNA samples generated from 2 independent coculture experiments. Ten micrograms of total RNA was subjected to first- and second-strand cRNA synthesis incorporating biotin-labeled nucleotides. cRNA was fragmented and subsequently hybridized overnight with microarray chips, using the manufacturer's hybridization buffer. Hybridized microarrays were washed and subjected to a signal-enhancement protocol consisting of an initial incubation with streptavidin–phycoerythrin (PE) conjugate, followed by staining with goat anti-streptavidin biotinylated antibody and a final staining with the streptavidin-PE conjugate. The microarrays were scanned using the GeneArray scanner with an argon ion laser excitation source, and emission was detected by a photomultiplier tube through a 570-nm long-pass filter. Digitized image data were processed using GeneChip Operating Software (Affymetrix). Data normalization was performed as described elsewhere [21]. Genes were considered to be up-regulated if averaged normalized ratios were  $\geq 2.0$  and were considered to be down-regulated if averaged normalized ratios were  $\leq -2.0$ .

**cDNA synthesis and real-time RT-PCR.** First-strand cDNAs were synthesized from 2  $\mu$ g of total RNA in a 21- $\mu$ L reaction volume by use of the SuperScript First-Strand Synthesis System for RT-PCR (Invitrogen). Quantitative real-time PCRs were performed in duplicate using the 7000 Sequence Detection System (Applied Biosystems). Independent PCRs were performed in triplicate, using the same cDNA for both the gene of interest and 18S rRNA, by use of the SYBR Green PCR Master Mix (Applied Biosystems). Gene-specific primers were designed for the gene of interest and 18S rRNA by use of Primer

Express software (version 2.0; Applied Biosystems) and the Oligo Analysis & Plotting Tool (Qiagen) and are listed in table 1. The PCR conditions consisted of AmpliTaq Gold activation at 95°C for 10 min, followed by 40 cycles of denaturation at 95°C for 15 s and annealing/extension at 60°C for 1 min. To verify that a single product was amplified, a dissociation curve was generated at the end of each PCR cycle, by use of software provided with the 7000 Sequence Detection System. The change in fluorescence of SYBR Green I dye in every cycle was monitored by the system software, and the cycle threshold (CT) above background for each reaction was calculated. The CT value of 18S rRNA was subtracted from that of the gene of interest to obtain a  $\Delta$ CT value. The  $\Delta$ CT value of the least abundant sample at all time points for each gene was subtracted from the  $\Delta$ CT value of each sample to obtain a  $\Delta\Delta$ CT value. The gene expression level relative to the calibrator was expressed as  $2^{-\Delta\Delta CT}$  [22].

**ELISAs.** MIP-1 $\beta$ , MIP-1 $\alpha$ , IL-8, and TNF- $\alpha$  concentrations were determined by use of commercial ELISA kits (R&D Systems). Supernatants were stored at -70°C until assayed. Experiments yielding supernatants were performed independently in duplicate, and each supernatant was plated in duplicate in the ELISA. Optical densities were read at the appropriate wavelength on a microplate reader, and measurements were calculated as means  $\pm$  SEs.

**Fluorescence-activated cell sorting (FACS) analysis.** *C. albicans*-THP-1 cell cocultures were performed as described above, except that the coculture incubation time was 6 h. Each culture was split into two 5-mL round-bottom tubes, and cells were collected briefly by centrifugation and washed twice in PBS. Cells were incubated with 20  $\mu$ L of either an anti-human CD83 monoclonal antibody or isotype control (both labeled with PE from

Pharmingen) at 4°C for 30 min, washed twice in PBS, and re-suspended in 0.5 mL of 1% paraformaldehyde. All samples were kept on ice until analyzed. Cell surface expression of CD83 was assessed on a Becton Dickinson FACSCalibur flow cytometer, with  $>1 \times 10^4$  events collected for each sample. Cells were gated according to light-scatter properties to exclude cellular debris. Gating for fluorescence intensity was determined by manually gating in the isotype control medium-cultured THP-1 cell sample and maintaining that gating for subsequent samples. Two replicate experiments were performed.

## RESULTS

The comparison of the gene-expression profiles of *C. albicans*-stimulated and unstimulated THP-1 cells revealed 131 genes differentially expressed by at least 2.0-fold (table 2). Of these, 47 genes were up-regulated, and 84 genes were down-regulated. The up-regulated antipathogen-response genes included *MIP1B*, *MIP1A*, and *TNFA*. Signal-transduction genes found to be up-regulated included *DSCR1* (Down syndrome critical region 1), *EGR3* (early growth response 3), *RGS1* (regulator of G protein signaling), and *FLT4* (fms-related tyrosine kinase 4). Pol II transcription genes that were down-regulated in THP-1 cells in response to *C. albicans* stimulation included *LMYC* and *CEBPA* (CCAAT/enhancer binding protein  $\alpha$ ). Other genes of interest that were down-regulated in THP-1 cells in response to *C. albicans* stimulation were the IL-10 receptor antagonist *IL10RA* and the chemokine receptor *CCR2*.

Further analysis was performed on several antipathogen-response genes and their gene products that are known to be responsive to *C. albicans*, by following their expression over time in response to *C. albicans* stimulation. Real-time RT-PCR

**Table 1. Sequences of primers used in real-time reverse-transcriptase polymerase chain reactions.**

| Gene           | Primer sequence                 |                                  |
|----------------|---------------------------------|----------------------------------|
|                | Forward                         | Reverse                          |
| 18S rRNA       | 5'-GCCCGAAGCGTTTACTTTGA-3'      | 5'-TCCATTATTCCTAGCTGCGGTATC-3'   |
| <i>CD83</i>    | 5'-ACACGGTCTCCTGGGTCAAGT-3'     | 5'-TCCCCTGAGGTGGTCTTCTC-3'       |
| <i>IL8</i>     | 5'-GTTTTTGAAGAGGGCTGAGAATTC-3'  | 5'-CATGAAGTGTGAAGTAGATTTGCTTG-3' |
| <i>MIP1A</i>   | 5'-CTGCATCACTTGCTGCTGACA-3'     | 5'-CACTGGCTGCTCGTCTCAAAG-3'      |
| <i>MIP1B</i>   | 5'-CAGCACCAATGGGCTCAGA-3'       | 5'-AAGCTTCCTCGCGGTGTAAG-3'       |
| <i>TNFA</i>    | 5'-GCCCAGGCAGTCAGATCATC-3'      | 5'-GGGTTTGCTACAACATGGGCT-3'      |
| <i>GROB</i>    | 5'-CTCAACCCCGCATCGC-3'          | 5'-GATTTGCCATTTTTCAGCATCTT-3'    |
| <i>CCR2</i>    | 5'-GCTGTCCACATCTCGTTCTCG-3'     | 5'-TCTTACCCTCTCCTGGTAT-3'        |
| <i>NCF2</i>    | 5'-GGATGCCTTCAGTGCCGT-3'        | 5'-TGTCTCGGTTAATGCTTCTGGTAA-3'   |
| <i>TNFAIP6</i> | 5'-TTAGCCATCCATCCAGCAGC-3'      | 5'-CCATCTCGCAACTTACAAGCAG-3'     |
| <i>DSCR1</i>   | 5'-CGAGTCAGAATAAACTTCAGCAACC-3' | 5'-GGTGTGAGCTTCCTATGTGTAAGGT-3'  |
| <i>EGR3</i>    | 5'-TTGGGAAAGTTCGCCTTCG-3'       | 5'-ATGATGTTGCTCCTGGCACCA-3'      |
| <i>RGS2</i>    | 5'-AAGATTGGAAGACCCGTTGAG-3'     | 5'-TCCCAGGAGTAGAGGAATTTGTAA-3'   |
| <i>RGS1</i>    | 5'-CTTCTGCTGCTGAAGTAATGC-3'     | 5'-TGACCAGTTTGGTTGGCAAG-3'       |
| <i>RGS16</i>   | 5'-TCACACACCTGAGTCTCCACG-3'     | 5'-CAACTCTCTTCCCCTGG-3'          |
| <i>FLT4</i>    | 5'-AAGAAGTCCACCACCAACAT-3'      | 5'-TGAAAATCCTGGCTCACAAGC-3'      |

**Table 2. Differential gene expression of THP-1 cells exposed to *Candida albicans* strain SC5314 versus medium.**

| Gene function category,<br>GenBank accession no. | Common name      | Molecular function                                       | Fold change<br>in expression<br>(SC5314 vs. medium) |
|--------------------------------------------------|------------------|----------------------------------------------------------|-----------------------------------------------------|
| <b>Antipathogen response</b>                     |                  |                                                          |                                                     |
| NM_002984                                        | <i>MIP1B</i>     | Cell motility and adhesion; inflammation                 | 8.5                                                 |
| NM_002983                                        | <i>MIP1A</i>     | Chemokine                                                | 6.5                                                 |
| NM_000594                                        | <i>TNFA</i>      | Mediates proinflammatory response, apoptosis             | 3.8                                                 |
| NM_004120                                        | <i>GBP2</i>      | Induced by IFN- $\gamma$ during macrophage activation    | 3.3                                                 |
| M57731                                           | <i>GROB</i>      | Produced by activated monocytes                          | 3.1                                                 |
| NM_000584                                        | <i>IL8</i>       | Chemoattraction, activation of neutrophils               | 3.0                                                 |
| NM_004233                                        | <i>CD83</i>      | Antigen presentation and/or lymphocyte activation        | 2.6                                                 |
| AW188198                                         | <i>TNFAIP6</i>   | May be involved in cell-cell communication               | 2.2                                                 |
| NM_001565                                        | <i>SCYB10</i>    | Chemotactic for monocytes and T cells                    | 2.1                                                 |
| NM_005384                                        | <i>NFIL3</i>     | Binds to promoters of <i>IFNG</i> and <i>IL3</i> genes   | 2.0                                                 |
| NM_001558                                        | <i>IL10RA</i>    | Binds IL-10 with high affinity                           | -2.2                                                |
| NM_000647                                        | <i>CCR2</i>      | Receptor for MCP-1, MCP-3, and MCP-4                     | -2.4                                                |
| BC001606                                         | <i>NCF2</i>      | Necessary for superoxide production                      | -2.4                                                |
| <b>Carbohydrate metabolism</b>                   |                  |                                                          |                                                     |
| M55905                                           | Malate enzyme    | Malate dehydrogenase                                     | 2.0                                                 |
| M33197                                           | <i>GAPDH</i>     | Second step in glycolysis                                | -2.4                                                |
| <b>Cell cycle</b>                                |                  |                                                          |                                                     |
| NM_005343                                        | <i>HRAS</i>      | Has intrinsic GTPase activity                            | -2.2                                                |
| NM_001761                                        | Cyclin F         | Involved in control of cell cycle during S and G2 phases | -2.2                                                |
| U17074                                           | <i>CDKN2C</i>    | Inhibits cell growth and proliferation                   | -2.3                                                |
| BE439987                                         | <i>GAS7</i>      | Maturation, differentiation of cerebellar neurons        | -2.3                                                |
| <b>Cell motility</b>                             |                  |                                                          |                                                     |
| NM_006289                                        | Talin 1          | Connections of cytoskeleton to plasma membrane           | -2.0                                                |
| NM_001613                                        | Actin $\alpha$ 2 | Structural component of cytoskeleton                     | -2.1                                                |
| X00351                                           | $\beta$ actin    | Structural component of cytoskeleton                     | -2.3                                                |
| <b>Cell proliferation</b>                        |                  |                                                          |                                                     |
| NM_001328                                        | <i>CTBP1</i>     | Corepressor targeting diverse transcription factors      | -2.9                                                |
| NM_003550                                        | <i>MAD1L1</i>    | Mitotic arrest deficient, yeast, homolog                 | -3.4                                                |
| <b>Cell stress</b>                               |                  |                                                          |                                                     |
| NM_005627                                        | <i>SGK</i>       | Serine/threonine kinase                                  | 3.1                                                 |
| BF575213                                         | <i>SOD2</i>      | Superoxide dismutase 2                                   | 2.0                                                 |
| <b>DNA binding</b>                               |                  |                                                          |                                                     |
| NM_002114                                        | <i>HIVEP1</i>    | May act in T cell activation                             | 2.7                                                 |
| NM_003670                                        | <i>BHLHB2</i>    | Transcription factor                                     | 2.7                                                 |
| NM_003542                                        | Histone H4       | Nucleosome formation                                     | 2.5                                                 |
| NM_001674                                        | <i>ATF3</i>      | Binds the cAMP response element (cre)                    | 2.4                                                 |
| AB002282                                         | <i>EDF1</i>      | Transcriptional activator                                | -2.0                                                |
| NM_014977                                        | <i>ACINUS</i>    | Chromatin condensation after activation by <i>CASP3</i>  | -2.1                                                |
| L04282                                           | <i>ZNF148</i>    | Involved in transcriptional regulation                   | -2.1                                                |
| AA972711                                         | <i>ZNF292</i>    | May function as a transcription factor                   | -2.1                                                |
| NM_002945                                        | <i>RPA1</i>      | Required for simian virus 40 DNA replication in vitro    | -2.2                                                |
| BE675843                                         | <i>FBXL11</i>    | f-box and leucine-rich repeat protein 11                 | -2.9                                                |
| BE795648                                         | <i>SSRP1</i>     | Recombination signal sequence recognition protein        | -3.4                                                |
| NM_019081                                        | <i>KIAA0430</i>  | Unknown                                                  | -3.7                                                |
| <b>DNA repair</b>                                |                  |                                                          |                                                     |
| AF034956                                         | <i>RAD51L3</i>   | Meiotic recombination, repair of damaged DNA             | 2.0                                                 |
| NM_002434                                        | <i>MPG</i>       | Excises damaged DNA formed by alkylated lesions          | -2.0                                                |
| <b>Lipid, fatty-acid, sterol metabolism</b>      |                  |                                                          |                                                     |
| BC005127                                         | <i>ADFP</i>      | Adipophilin                                              | 2.9                                                 |
| NM_000237                                        | <i>LPL</i>       | Hydrolyzes triacylglycerol component of lipoproteins     | 2.6                                                 |
| NM_016372                                        | <i>TPRA40</i>    | Unknown                                                  | -2.1                                                |
| NM_012268                                        | <i>PLD3</i>      | Phospholipase D3                                         | -3.2                                                |

(continued)

**Table 2. (Continued.)**

| Gene function category,<br>GenBank accession no. | Common name        | Molecular function                                               | Fold change<br>in expression<br>(SC5314 vs. medium) |
|--------------------------------------------------|--------------------|------------------------------------------------------------------|-----------------------------------------------------|
| Other metabolism                                 |                    |                                                                  |                                                     |
| NM_000361                                        | Thrombomodulin     | Responsible for conversion of activated protein C                | -2.9                                                |
| NM_000101                                        | <i>CYBA</i>        | $\alpha$ subunit of cytochrome <i>b</i>                          | -3.2                                                |
| Pol II transcription                             |                    |                                                                  |                                                     |
| X99268                                           | <i>TWIST</i>       | Regulates the HAT activities of p300 and PCAF                    | 2.3                                                 |
| AA349848                                         | ...                | Unknown                                                          | -2.0                                                |
| U62296                                           | <i>NFYC</i>        | Stimulates transcription by binding CCAAT                        | -2.0                                                |
| M19720                                           | <i>LMYC</i>        | Transcription factor                                             | -2.0                                                |
| AL022398                                         | <i>IRF6</i>        | Transcription factor                                             | -2.0                                                |
| NM_002695                                        | RNA pol II, E      | Subunit of RNA polymerase II                                     | -2.1                                                |
| NM_003721                                        | <i>RFXANK</i>      | Activates transcription from class II MHC promoters              | -2.1                                                |
| NM_004364                                        | <i>CEBPA</i>       | CCAAT/enhancer binding protein $\alpha$                          | -3.7                                                |
| Protein degradation                              |                    |                                                                  |                                                     |
| AL545523                                         | <i>PSMC3</i>       | Degradation of ubiquitinated proteins                            | -2.4                                                |
| Protein folding                                  |                    |                                                                  |                                                     |
| AB034951                                         | <i>hsp73</i>       | Chaperone                                                        | -2.1                                                |
| Protein modification                             |                    |                                                                  |                                                     |
| AL541302                                         | <i>SERPINE2</i>    | Serine protease inhibitor                                        | 3.1                                                 |
| NM_001774                                        | <i>CD37</i>        | Leukocyte differentiation antigen                                | -2.0                                                |
| NM_003801                                        | <i>GPAA1</i>       | Human GPI anchor attachment protein                              | -2.0                                                |
| AA631254                                         | <i>MAN1B1</i>      | Maturation of Asn-linked oligosaccharides                        | -2.0                                                |
| NM_006278                                        | <i>SIAT4C</i>      | Involved in amino acid glycosylation                             | -2.4                                                |
| NM_014501                                        | <i>E2EPF</i>       | Keratinocyte ubiquitin carrier protein                           | -2.6                                                |
| U17496                                           | <i>PSMB8</i>       | Generates class I binding peptides                               | -2.6                                                |
| NM_000918                                        | <i>P4HB</i>        | Procollagen-proline, 2-oxoglutarate 4-dioxygenase                | -3.3                                                |
| Protein synthesis                                |                    |                                                                  |                                                     |
| NM_002708                                        | <i>PPP1CA</i>      | Participates in regulation of protein synthesis                  | -2.6                                                |
| AF104913                                         | eIF-4G1            | Recognition of mRNA cap                                          | -2.6                                                |
| BC001173                                         | eIF-3 $\eta$       | Promotes binding of met-tRNA <sub>i</sub> and mRNA               | -2.9                                                |
| AA393940                                         | eIF-5A             | Promotes formation of first peptide bond                         | -3.0                                                |
| RNA processing                                   |                    |                                                                  |                                                     |
| AA112507                                         | <i>LSM4</i>        | Binds to 3'-terminal u tract of u6 snRNA                         | -2.2                                                |
| BG528818                                         | <i>CDC40</i>       | May function in second step of pre-mRNA splicing                 | -2.4                                                |
| BC003629                                         | snRNA U2           | Spliceosome component                                            | -2.8                                                |
| AI925305                                         | <i>S164</i>        | Unknown                                                          | -3.8                                                |
| Signal transduction                              |                    |                                                                  |                                                     |
| NM_004414                                        | <i>DSCR1</i>       | May be involved in transcriptional regulation                    | 5.9                                                 |
| NM_004430                                        | <i>EGR3</i>        | Putative transcription factor                                    | 4.9                                                 |
| NM_002923                                        | <i>RGS2</i>        | Negatively regulates G protein-coupled receptor signal           | 4.3                                                 |
| NM_002922                                        | <i>RGS1</i>        | Negatively regulates G protein-coupled receptor signal           | 4.0                                                 |
| BF304996                                         | <i>RGS16</i>       | Negatively regulates G protein-coupled receptor signal           | 3.5                                                 |
| NM_002664                                        | Pleckstrin         | Has an EF-hand calcium-binding motif                             | 2.6                                                 |
| M31159                                           | <i>IGFBP1</i>      | Potentiates insulin-like growth factor activity                  | 2.6                                                 |
| AI754416                                         | <i>CEP3</i>        | Cdc42 effector protein 3                                         | 2.4                                                 |
| NM_019903                                        | Adducin 3          | Binds to calmodulin                                              | 2.4                                                 |
| U58111                                           | <i>FLT4</i>        | Similar to vascular endothelial growth factor                    | 2.2                                                 |
| U08015.1                                         | <i>NFATc</i>       | Nuclear factor of activated T cells                              | 2.0                                                 |
| NM_002607                                        | <i>PDGFA</i>       | Member of VEGF and PDGF family                                   | 2.0                                                 |
| NM_000376                                        | Vitamin D receptor | Nuclear hormone receptor                                         | -2.0                                                |
| NM_012120                                        | <i>CD2AP</i>       | Adapter protein between membrane proteins and actin cytoskeleton | -2.0                                                |
| NM_003646                                        | <i>DGKZ</i>        | Eukaryotic diacylglycerol kinase family                          | -2.2                                                |
| AI809341                                         | <i>CD45</i>        | T cell activation through the antigen receptor                   | -2.2                                                |
| BF439282                                         | <i>PDZGEF1</i>     | Ras/Rap1A-associating guanine exchange factor                    | -2.3                                                |
| U34074                                           | <i>AKAP1</i>       | Anchors PKA to mitochondrial outer membrane                      | -2.3                                                |

(continued)

**Table 2. (Continued.)**

| Gene function category,<br>GenBank accession no. | Common name          | Molecular function                           | Fold change<br>in expression<br>(SC5314 vs. medium) |
|--------------------------------------------------|----------------------|----------------------------------------------|-----------------------------------------------------|
| NM_000565                                        | IL6 receptor         | IL-6 receptor complex subunit                | -2.3                                                |
| NM_014017                                        | <i>MAPBPIP</i>       | Modulator of MAPK kinase signaling           | -2.6                                                |
| BE675800                                         | <i>RXRA</i>          | Nuclear hormone receptor                     | -2.9                                                |
| U88968                                           | <i>MBP1</i>          | myc-binding protein 1                        | -2.9                                                |
| NM_002872                                        | <i>RAC2</i>          | Involved in regulation of NADPH oxidase      | -3.4                                                |
| NM_006472                                        | <i>TXNIP</i>         | Unknown                                      | -3.6                                                |
| Small molecule transport                         |                      |                                              |                                                     |
| NM_002667                                        | Phospholamban        | Calcium channel regulator                    | 2.9                                                 |
| NM_031213                                        | <i>MGC5244</i>       | Unknown                                      | -2.0                                                |
| AF145029                                         | Importin 12          | Nuclear transport receptor                   | -2.0                                                |
| NM_021213                                        | <i>PCTP</i>          | Facilitates transfer of phosphatidylcholine  | -2.0                                                |
| AL566172                                         | <i>ATP6VOD1</i>      | Transport processes in vacuolar system       | -2.4                                                |
| AI718937                                         | <i>KCTD12</i>        | Unknown                                      | -2.8                                                |
| Unknown                                          |                      |                                              |                                                     |
| NM_013332                                        | <i>HIG2</i>          | Hypoxia-inducible protein                    | 3.1                                                 |
| NM_018470                                        | <i>HT009</i>         | Unknown                                      | 2.7                                                 |
| NM_006096                                        | <i>NDRG1</i>         | Induced by nickel, homocysteine, tunicamycin | 2.6                                                 |
| NM_024121                                        | <i>FLJ20979</i>      | Unknown                                      | 2.2                                                 |
| NM_018603                                        | <i>PRO1496</i>       | Unknown                                      | 2.2                                                 |
| BE858194                                         | <i>FLJ37393</i>      | Unknown                                      | 2.2                                                 |
| AI348009                                         | ...                  | Unknown                                      | 2.1                                                 |
| AF041410                                         | <i>MAG</i>           | Unknown                                      | 2.1                                                 |
| AL136842                                         | <i>DKFZp434A0530</i> | Unknown                                      | 2.0                                                 |
| NM_001450                                        | <i>FHL2</i>          | Unknown                                      | 2.0                                                 |
| W84482                                           | <i>RYBP</i>          | Unknown                                      | 2.0                                                 |
| BF221673                                         | <i>IDN3</i>          | Unknown                                      | -2.0                                                |
| AK025608                                         | <i>FLJ21955</i>      | Unknown                                      | -2.0                                                |
| N80935                                           | ...                  | Unknown                                      | -2.0                                                |
| W19873                                           | <i>THAP11</i>        | Unknown                                      | -2.0                                                |
| AL136821                                         | <i>KIAA0701</i>      | Unknown                                      | -2.0                                                |
| NM_022372                                        | <i>GBL</i>           | Unknown                                      | -2.0                                                |
| AU151793                                         | <i>FLJ12793</i>      | Unknown                                      | -2.1                                                |
| BC004913                                         | <i>PRCC</i>          | Unknown                                      | -2.1                                                |
| NM_018133                                        | <i>FLJ10546</i>      | Unknown                                      | -2.2                                                |
| AA114166                                         | <i>LOC157919</i>     | Unknown                                      | -2.2                                                |
| BC001425                                         | <i>DDA3</i>          | Unknown                                      | -2.2                                                |
| AF067173                                         | <i>MAGOH</i>         | Unknown                                      | -2.3                                                |
| BE256479                                         | <i>LOC344737</i>     | Unknown                                      | -2.3                                                |
| AK022732                                         | <i>FLJ12670</i>      | Unknown                                      | -2.5                                                |
| BC002574                                         | <i>FLJ10520</i>      | Unknown                                      | -2.7                                                |
| NM_014887.1                                      | <i>CG005</i>         | Unknown                                      | -2.7                                                |
| NM_000918                                        | <i>P4HB</i>          | Unknown                                      | -3.3                                                |
| Vesicular transport                              |                      |                                              |                                                     |
| AK001465                                         | <i>SEC63</i>         | Integral membrane protein                    | 2.0                                                 |

**NOTE.** GPI, glycosylphosphatidylinositol; HAT, histone acetyltransferase; IFN, interferon; IL, interleukin; MAPK, mitogen-activated protein kinase; MCP, monocyte chemotactic protein; MHC, major histocompatibility complex; PCAF, p300/CREB binding protein-associated factor; PDGF, platelet-derived growth factor; PKA, protein kinase A; VEGF, vascular endothelial growth factor.

revealed early, maximal expression (by 3 h) of *TNFA*, *MIP1A*, *CD83*, and *MIP1B* mRNA in THP-1 cells cocultured with *C. albicans* (figure 1). In these same cells, *IL8* mRNA expression reached maximal expression levels by 9 h.

Supernatants from THP-1 cells cocultured with *C. albicans*

or in medium alone were used to measure cytokine/chemokine levels by ELISA (figure 2). As expected, cells stimulated by *C. albicans* produced significantly more IL-8, TNF- $\alpha$ , MIP-1 $\alpha$ , and MIP-1 $\beta$  protein than did cells cultured in medium alone. CD83 protein expression at 6 h was assessed by surface staining of

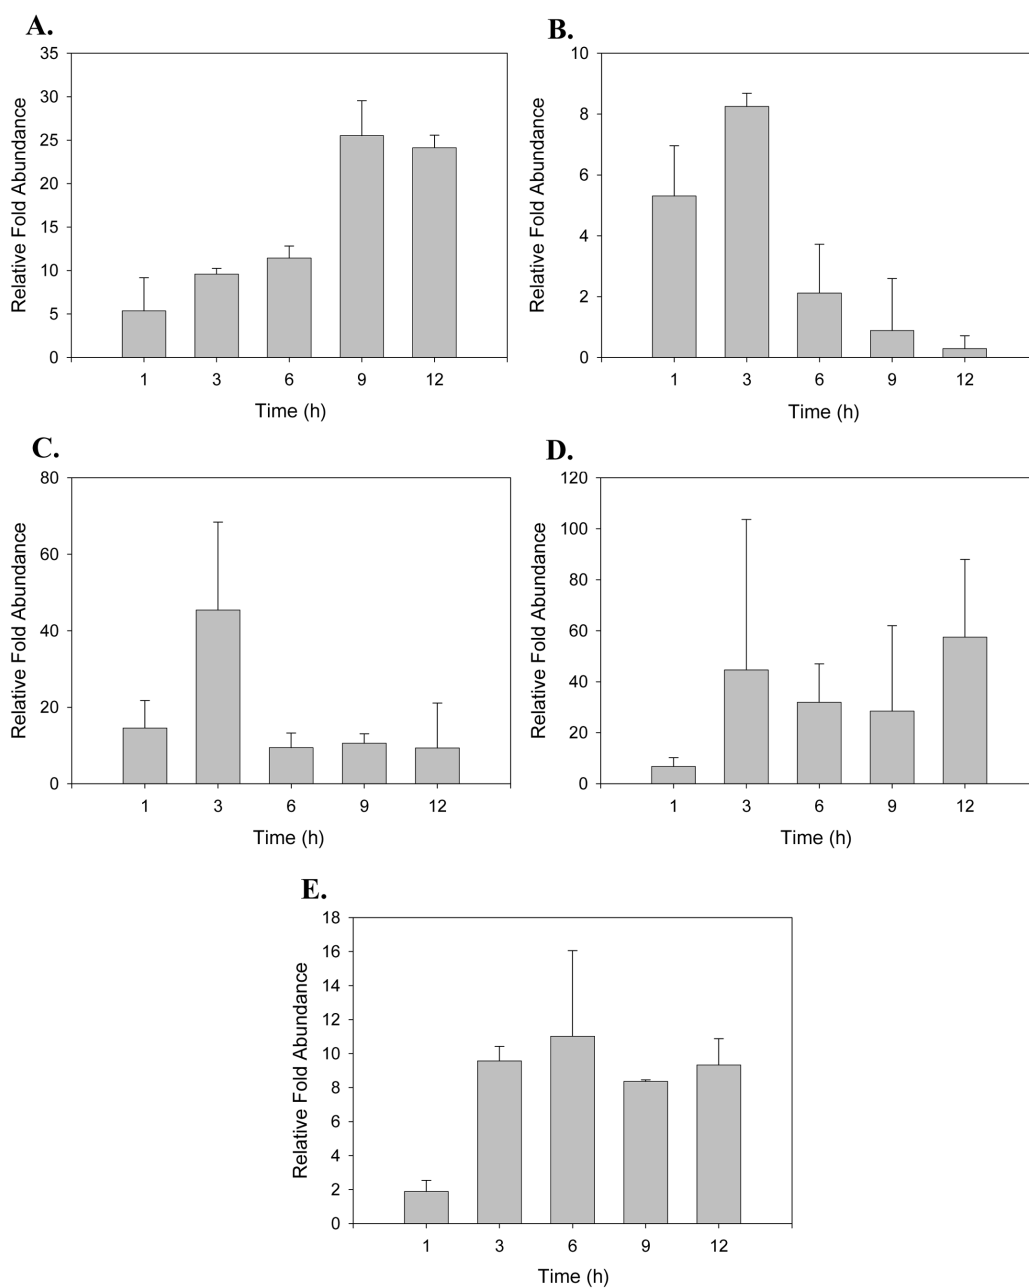

**Figure 1.** Real-time reverse-transcriptase polymerase chain reaction (RT-PCR) analysis of *IL8* (A), *TNFA* (B), *MIP1A* (C), *MIP1B* (D), and *CD83* (E) RNA expression in THP-1 cells in response to *Candida albicans*. Expression levels were normalized and compared with the sample with the least abundant signal, as described in Materials and Methods. Data represent the mean of 3 measurements of 2 real-time RT-PCR experiments.

stimulated and unstimulated THP-1 cells with PE-labeled anti-human CD83 monoclonal antibody and subsequent analysis by flow cytometry (figure 3). Although there was modest surface expression of CD83 on cells cultured in medium alone, there was an increase in the level of surface expression of CD83 on cells stimulated with *C. albicans*. Specifically, the mean channel on the FACS histogram shifted from 7.55 for medium-stimulated cells to 16.37 for *C. albicans*-stimulated cells, suggesting that each THP-1 cell analyzed by FACS increased the

number of CD83 molecules on its surface. Surprisingly, *IL1B* failed to reach the minimum cutoff of 2-fold difference in expression in the microarray analysis. *IL1B* was therefore examined by real-time RT-PCR over time. *IL1B*, like *IL8*, also reached its maximal level of expression by 9 h (figure 4).

Several genes previously not known to be involved in the host response to *C. albicans* were also selected for further examination of mRNA expression by real-time RT-PCR (figure 4). These included *DSCR1*, *RGS1*, *RGS2*, *RGS16*, *GROB*, *EGR3*,

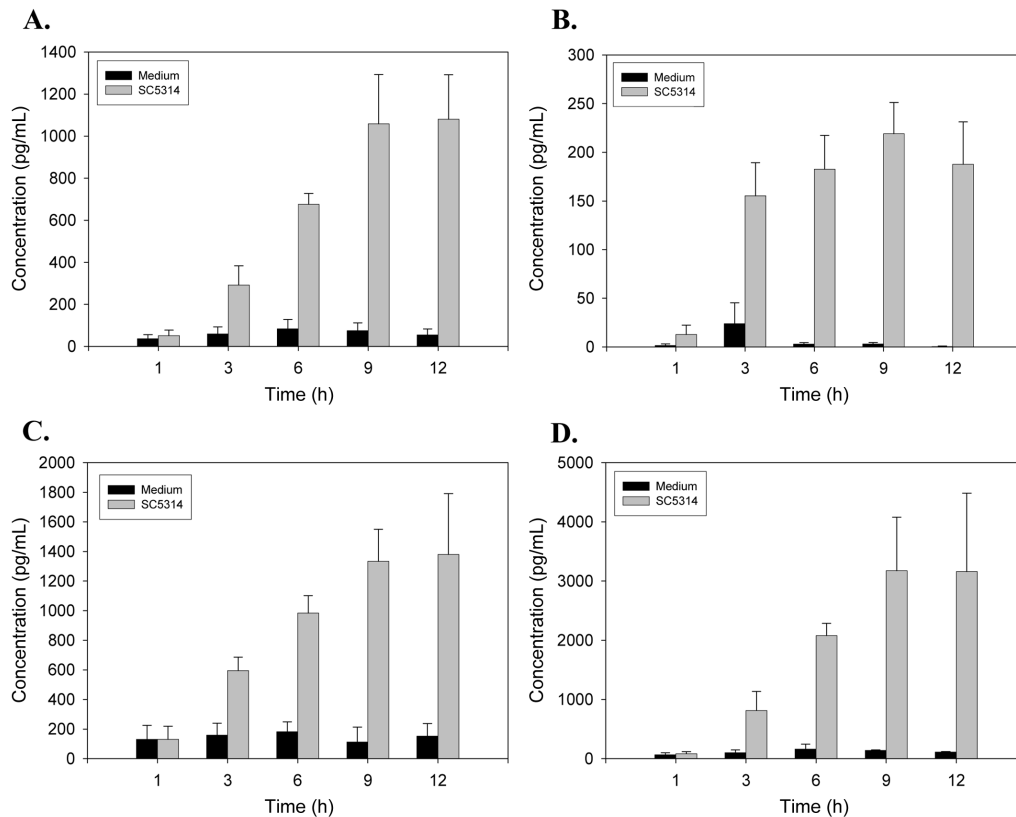

**Figure 2.** ELISAs measuring protein expression of interleukin (IL)-8 (A), tumor necrosis factor (TNF)- $\alpha$  (B), macrophage inflammatory protein (MIP)-1 $\alpha$  (C), and MIP-1 $\beta$  (D) from THP-1 cells in response to *Candida albicans*. Data represent means  $\pm$  SEs of duplicate samples from independent duplicate experiments.

*FLT4*, *CCR2*, *TNFAIP6*, and *NCF2*. *DSCR1*, *RGS2*, *GROB*, and *FLT4* had expression patterns similar to those of *TNFA*, *IL1B*, *MIP1A*, and *MIP1B*. *RGS1* exhibited an expression pattern similar to that of *IL8*, with a maximal expression of nearly 40-fold at the 6-h time point that was sustained for the remainder of the time course. *NCF2* and *CCR2* exhibited an expression pattern that was inverse to that of *RGS1* and *IL8*, with expression levels decreasing at least 2-fold by the 6-h time point. *RGS16* and *TNFAIP6* exhibited later maximal expression similar to that of *RGS1* and *IL8*, but their expression levels decreased at later time points.

## DISCUSSION

**Induction by *C. albicans* of expression of antipathogen response genes in THP-1 cells.** Among the most highly represented up-regulated genes were those involved in the antipathogen response, with *MIP1A* and *MIP1B* the most up-regulated genes identified by microarray. Interestingly, *IL8* mRNA production was much greater at later time points than at 3 h, when RNA was harvested for microarray hybridization, suggesting that *IL8* may respond to factors produced earlier in the stimulation. Although it did not make the 2-fold cutoff for

inclusion in the list of differentially expressed genes, with an average of 1.8-fold expression (data not shown), *IL1B* was examined by real-time RT-PCR time course analysis, since its expression in human leukocytes was previously associated with response to *C. albicans* infection [9]. The analysis indicated that *IL1B* levels were at least 2-fold higher at every time point in *C. albicans*-stimulated cells than in medium-cultured cells.

Some *C. albicans*-specific, antipathogen-response genes we did not see in our list of differentially expressed genes were *IL10*, *IL12A*, *IL12B*, and *SCYA5* (RANTES). *IL10* has been shown to be up-regulated in monocytes in response to filamentous *C. albicans*. *IL12A* and *IL12B*, genes that encode the p35 and p40 subunits of IL-12 p70, have been demonstrated to be up-regulated in response to yeast forms of *C. albicans*. RANTES has also been shown to be expressed in response to *C. albicans* stimulation. Because the experiments in the present study were performed with filamenting *C. albicans*, it was not surprising to not see up-regulation of *IL12A* or *IL12B*. One study reported detection of *IL10* mRNA in DCs in response to hyphae at 18 h after stimulation [23]. RANTES mRNA expression is reported in the literature to be increased slightly at 3 h and greatly increased at 20 h after stimulation in PBMCs; however, the



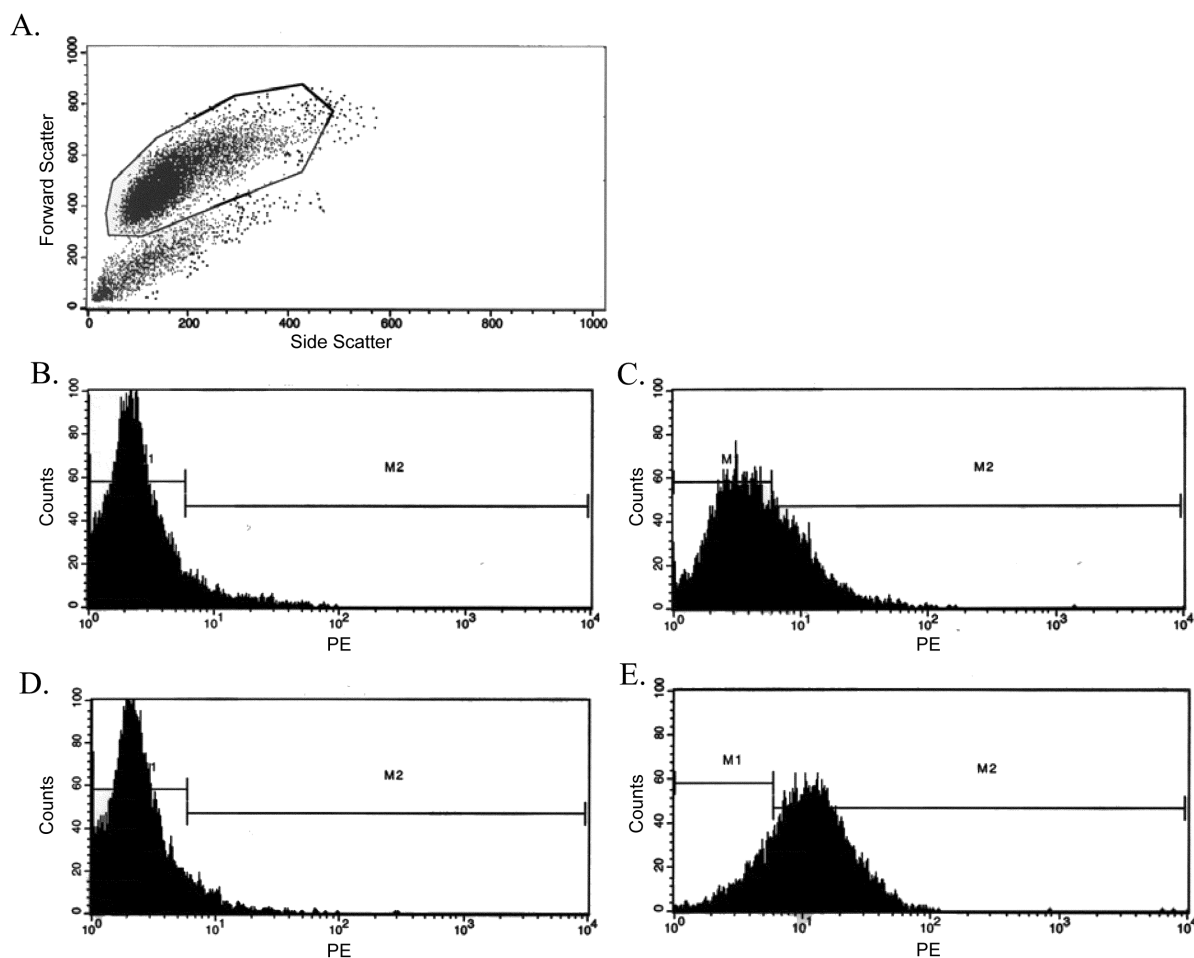

**Figure 3.** Fluorescence-activated cell sorting analysis of CD83 expression on THP-1 cells in response to *Candida albicans*. *A*, Scatter plot indicating the cell population analyzed in subsequent histograms. *B* and *C*, Histograms of THP-1 cells cultured in medium and stained with phycoerythrin (PE)-labeled antibodies to the isotype control (*B*) or human CD83 (*C*). *D* and *E*, Histograms of *C. albicans*-stimulated THP-1 cells stained with PE-labeled antibodies to the isotype control (*D*) or human CD83 (*E*). Histograms and scatter plot shown are representative of 2 experiments.

expression level is not quantified from the Northern hybridizations shown [6].

*TNFA* was also up-regulated in *C. albicans*-stimulated THP-1 cells. Several studies have described the increased expression of this cytokine in monocyte, granulocyte, or PBMC cultures with *C. albicans* [24–27]. Additionally, we observed that *TNFA* mRNA induction is at its highest level within 1 h of coculture and is virtually at its maximal protein level by 3 h. Such an early *TNFA* response may be critical and responsible for the induction of many of the other molecules in the gene list. For example, *ATF3* (activating transcription factor 3), *DSCR1*, and *RGS16* are inducible by  $TNF-\alpha$  [28–30].  $TNF-\alpha$  also strengthens the function of monocyte-derived CD83<sup>+</sup> DCs by enhancing their proliferation in the presence of *C. albicans*, protecting their phagocytic ability, and enhancing their allogeneic T-cell stimulatory activity [31].

The up-regulation of *CD83* in THP-1 cells was somewhat

surprising, since it is a marker on mature DCs. However, monocytes stimulated with *C. albicans* hyphae had increased expression of CD83, although they possessed characteristics atypical of DCs [25]. Although CD83 is primarily used as a cell surface determinant, studies designed to determine a potential role of the molecule in DCs have shown that soluble forms to be involved in modulating the immune response of T cells by inhibiting DC-driven allogeneic and peptide-specific T cell proliferation while inhibiting the maturation of DCs by causing the down-regulation of CD80 and CD83 on immature DCs [32].

*TNFAIP6* (also known as TNF-stimulated gene 6, or *TSG6*) is expressed in mononuclear cells, among other cell types, in response to  $TNF-\alpha$  and IL-1. It is thought to function as an anti-inflammatory molecule, as part of a negative feedback loop during inflammation [33]. It also acts to inhibit protease action during inflammation, by forming stable complexes with components of the serine protease inhibitor inter- $\alpha$  inhibitor (I $\alpha$ I),

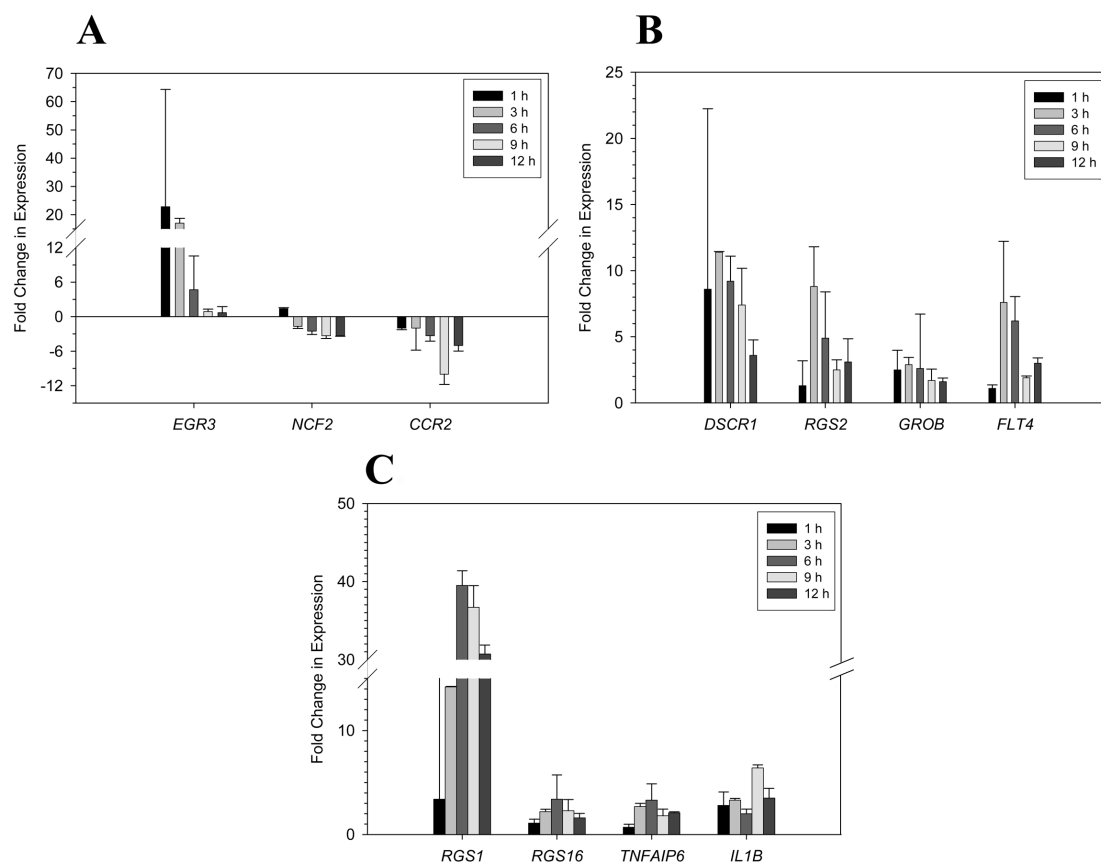

**Figure 4.** Results of real-time reverse-transcriptase polymerase chain reaction (RT-PCR) on expression of selected other genes in THP-1 cells cultured with *Candida albicans*, compared with THP-1 cells cultured in medium alone. Genes are grouped according to highest expression level before 3 h (A), at 3 h (B), or at 6 h or later (C). Expression levels were normalized to 18S rRNA levels and compared with the level found in the corresponding medium control sample. Data represent the mean of 3 measurements of 2 real-time RT-PCR experiments.

which inhibits the protease activity of plasmin, important in the protease network associated with inflammation. The induction of *TNFAIP6* is consistent with the expression of *TNFA* in response to *C. albicans* stimulation.

*CCR2*, which is down-regulated 2.4-fold in response to *C. albicans*, is a G protein-coupled receptor for the chemokines monocyte chemoattractant protein (MCP)-1, MCP-3, and MCP-4. Examination of a pulmonary *Cryptococcus neoformans* infection model in *CCR2* knockout mice revealed that these mice had a prolonged duration of disease and were less able to recruit macrophages and CD8<sup>+</sup> T cells into the lung [34]. These mice were found to have a Th2-type response, chronic pulmonary eosinophilia, and high serum IgE levels, suggesting that *CCR2* is required for the development of a Th1 response to *C. neoformans*. Additionally, studies of the maturation of DCs revealed that expression of *CCR2* mRNA was down-regulated to non-detectable levels [35].

The protein encoded by *NCF2* (neutrophil cytosol factor 2, or p67<sup>phox</sup>) is the limiting cofactor in the assembly of the NADPH oxidase enzyme complex in neutrophils. NADPH oxidase catalyzes the production of oxygen radicals that are essential

in the defense against pathogens, and the *NCF2* gene product is involved in the final activation of the enzyme complex. Although TNF- $\alpha$ -treated monocytic cells have *NCF2* up-regulation [36], the present study indicates that *NCF2* is down-regulated in the presence of increased levels of TNF- $\alpha$ . It is possible that some other factor produced in response to *C. albicans* is overriding the effect of TNF- $\alpha$  in modulating the expression of *NCF2* in *C. albicans*-stimulated cells.

*GROB* (or *MIP2A*), up-regulated >3-fold in this study, is produced by activated monocytes and neutrophils at the site of inflammation. It enhances neutrophil function by increasing CD11b cell surface expression, superoxide production, chemotaxis, and enhancing killing [37]. *GROB* also enhances superoxide production in monocytes and has recently been shown to be produced by monocyte-derived DCs in response to bacterial flagellar proteins or lipopolysaccharide [38].

**Differential expression of signal transduction molecules in *C. albicans*-stimulated THP-1 cells.** *DSCR1* is a gene found in the chromosome 21 Down syndrome critical region. Recently, it was found to be involved in putative negative feedback regulation after vascular endothelial growth factor (VEGF)

stimulation in endothelial cells [29]. Similar to cyclosporin A, it is antagonistic to calcineurin signaling, resulting in down-regulation of several VEGF-responsive genes, such as *ESEL* (E-selectin). These genes have been shown to be up-regulated in endothelial cells upon stimulation with *C. albicans* [39]. It is possible that *DSCR1* up-regulation in *C. albicans*-stimulated THP-1 cells is involved with the normal negative regulation of monocyte-specific molecules during the inflammatory process.

The molecules *RGS1*, *RGS2*, and *RGS16* were up-regulated ~4-fold in response to SC5314. Each are involved with regulating GTPase activity of the  $G\alpha$  subunit of G protein-coupled receptors, diminishing the duration of downstream signaling that occurs. Previously, it was shown that disruption of *RGS1* in mice leads to abnormal trafficking of antibody-secreting cells, as well as to abnormalities in the spleen and Peyer patches [40]. Another study demonstrated that TLR signaling in human monocyte-derived DCs leads to increased *RGS1* and *RGS16* expression [41]. In short, it seems that the *RGS* gene products help to ensure normal responses of monocyte-derived DCs through TLRs and chemokine receptors.

*EGR3* is a zinc-finger transcription factor and an immediate-early gene product. It was up-regulated nearly 5-fold in response to *C. albicans*. Expression of *EGR3* is inhibited by cyclosporin A and can be induced by a variety of external stimuli [42]. *EGR3* activates transcription of many genes, including *FasL*, *TRAIL*, and *TNFA* [43].

*FLT4*, which is up-regulated >2-fold in response to *C. albicans*, is a VEGF receptor typically found on the surface of endothelial cells. A recent study reports *FLT4* protein expression on the surface of immature DCs that were derived from CD14<sup>+</sup> monocytes cultured with granulocyte-macrophage colony-stimulating factor and IL-4 [44]. These immature DCs also expressed CD1a, HLA-DR, and CD86, as well as endothelial cell markers such as VE-cadherin and FLT1. However, as these cells were allowed to mature in the presence of TNF- $\alpha$ , they lost their expression of endothelial cell markers in favor of CD83 expression. The role of *FLT4* in THP-1 cells in response to *C. albicans* expression is unclear.

**Down-regulation of protein-synthesis genes in response to *C. albicans* stimulation.** Four protein-synthesis genes were down-regulated in cells cocultured with *C. albicans*. Since there are >30 genes involved in translation initiation, the down-regulation of these genes was probably not indicative of down-regulation of protein synthesis in general. In fact, one of these genes, *eIF5A*, has been demonstrated recently to be a regulator of p53 [45]. Up-regulation of *eIF5A* leads to p53 up-regulation and increased probability of apoptosis. Therefore, down-regulation of *eIF5A* in the present study may have contributed to the proliferation of THP-1 cells in response to *C. albicans* stimulation.

**Conclusions.** The present study provides important information about the gene-expression profile of human monocyte-

like cells in response to *C. albicans*. Identification of newly identified genes provides insight into the regulation of the anti-pathogen response, while time course studies indicate the dynamics of the response. Future studies examining the role of the *RGS* genes, *DSCR1*, *EGR3*, and *FLT4* in the host response to *C. albicans*, especially pertaining to their interaction with TLRs or other *C. albicans*-interacting molecules, is warranted.

## References

- Edmond MB, Wallace SE, McClish DK, Pfaller MA, Jones RN, Wenzel RP. Nosocomial bloodstream infections in United States hospitals: a three-year analysis. *Clin Infect Dis* **1999**; 29:239–44.
- Viscoli C, Girmenia C, Marinus A, et al. Candidemia in cancer patients: a prospective, multicenter surveillance study by the Invasive Fungal Infection Group (IFIG) of the European Organization for Research and Treatment of Cancer (EORTC). *Clin Infect Dis* **1999**; 28:1071–9.
- Diamond RD, Oppenheim F, Nakagawa Y, Krzesicki R, Haudenschild CC. Properties of a product of *Candida albicans* hyphae and pseudohyphae that inhibits contact between the fungi and human neutrophils in vitro. *J Immunol* **1980**; 125:2797–804.
- Cassatella MA, Meda L, Gasperini S, D'Andrea A, Ma X, Trinchieri G. Interleukin-12 production by human polymorphonuclear leukocytes. *Eur J Immunol* **1995**; 25:1–5.
- Lloyd AR, Oppenheim JJ. Poly's lament: the neglected role of the polymorphonuclear neutrophil in the afferent limb of the immune response. *Immunol Today* **1992**; 13:169–72.
- Huang C, Levitz SM. Stimulation of macrophage inflammatory protein-1 $\alpha$ , macrophage inflammatory protein-1 $\beta$ , and RANTES by *Candida albicans* and *Cryptococcus neoformans* in peripheral blood mononuclear cells from persons with and without human immunodeficiency virus infection. *J Infect Dis* **2000**; 181:791–4.
- Aybay C, Imir T. Tumor necrosis factor (TNF) induction from monocyte/macrophages by *Candida* species. *Immunobiology* **1996**; 196:363–74.
- Trinchieri G. The two faces of interleukin-12: a pro-inflammatory cytokine and a key immunoregulatory molecule produced by antigen-presenting cells. *Ciba Found Symp* **1995**; 195:203–14.
- Xiong J, Kang K, Liu L, Yoshida Y, Cooper KD, Ghannoum MA. *Candida albicans* and *Candida krusei* differentially induce human blood mononuclear cell interleukin-12 and gamma interferon production. *Infect Immun* **2000**; 68:2464–9.
- Netea MG, Van Der Graaf CA, Vonk AG, Verschueren I, Van Der Meer JW, Kullberg BJ. The role of toll-like receptor (TLR) 2 and TLR4 in the host defense against disseminated candidiasis. *J Infect Dis* **2002**; 185:1483–9.
- Forsyth CB, Mathews HL. Lymphocyte adhesion to *Candida albicans*. *Infect Immun* **2002**; 70:517–27.
- Brown GD, Herre J, Williams DL, Willment JA, Marshall AS, Gordon S. Dectin-1 mediates the biological effects of  $\beta$ -glucans. *J Exp Med* **2003**; 197:1119–24.
- Deva R, Shankaranarayanan P, Ciccoli R, Nigam S. *Candida albicans* induces selectively transcriptional activation of cyclooxygenase-2 in HeLa cells: pivotal roles of Toll-like receptors, p38 mitogen-activated protein kinase, and NF- $\kappa$ B. *J Immunol* **2003**; 171:3047–55.
- Jouault T, Bernigaud A, Lepage G, Trinel PA, Poulain D. The *Candida albicans* phospholipomannan induces in vitro production of tumour necrosis factor-alpha from human and murine macrophages. *Immunology* **1994**; 83:268–73.
- Suzuki T, Tsuzuki A, Ohno N, Ohshima Y, Yadomae T. Enhancement of IL-8 production from human monocytic and granulocytic cell lines, THP-1 and HL-60, stimulated with *Malassezia furfur*. *FEMS Immunol Med Microbiol* **2000**; 28:157–62.
- Marr KA, Koudadoust M, Black M, Balajee SA. Early events in mac-

- rophage killing of *Aspergillus fumigatus* conidia: new flow cytometric viability assay. *Clin Diagn Lab Immunol* **2001**;8:1240–7.
17. Puig-Kroger A, Serrano-Gomez D, Caparros E, et al. Regulated expression of the pathogen receptor dendritic cell-specific intercellular adhesion molecule 3 (ICAM-3)-grabbing nonintegrin in THP-1 human leukemic cells, monocytes, and macrophages. *J Biol Chem* **2004**;279:25680–8.
  18. Charrad RS, Gadhoum Z, Qi J, et al. Effects of anti-CD44 monoclonal antibodies on differentiation and apoptosis of human myeloid leukemia cell lines. *Blood* **2002**;99:290–9.
  19. Rogers PD, Thornton J, Barker KS, et al. Pneumolysin-dependent and -independent gene expression identified by cDNA microarray analysis of THP-1 human mononuclear cells stimulated by *Streptococcus pneumoniae*. *Infect Immun* **2003**;71:2087–94.
  20. Cousins RJ, Blanchard RK, Popp MP, et al. A global view of the selectivity of zinc deprivation and excess on genes expressed in human THP-1 mononuclear cells. *Proc Natl Acad Sci USA* **2003**;100:6952–7.
  21. Affymetrix. Affymetrix genechip operating software user's guide. Available at: <http://www.affymetrix.com/>. Accessed 22 March 2005.
  22. Winer J, Jung CK, Shackel I, Williams PM. Development and validation of real-time quantitative reverse transcriptase-polymerase chain reaction for monitoring gene expression in cardiac myocytes in vitro. *Anal Biochem* **1999**;270:41–9.
  23. Romagnoli G, Nisini R, Chiani P, et al. The interaction of human dendritic cells with yeast and germ-tube forms of *Candida albicans* leads to efficient fungal processing, dendritic cell maturation, and acquisition of a Th1 response-promoting function. *J Leukoc Biol* **2004**;75:117–26.
  24. Torosantucci A, Chiani P, Cassone A. Differential chemokine response of human monocytes to yeast and hyphal forms of *Candida albicans* and its relation to the  $\beta$ -1,6 glucan of the fungal cell wall. *J Leukoc Biol* **2000**;68:923–32.
  25. Torosantucci A, Romagnoli G, Chiani P, et al. *Candida albicans* yeast and germ tube forms interfere differently with human monocyte differentiation into dendritic cells: a novel dimorphism-dependent mechanism to escape the host's immune response. *Infect Immun* **2004**;72:833–43.
  26. Netea MG, Stuyt RJ, Kim SH, Van der Meer JW, Kullberg BJ, Dinarello CA. The role of endogenous interleukin (IL)-18, IL-12, IL-1 $\beta$ , and tumor necrosis factor- $\alpha$  in the production of interferon- $\gamma$  induced by *Candida albicans* in human whole-blood cultures. *J Infect Dis* **2002**;185:963–70.
  27. Mullick A, Elias M, Harakidas P, et al. Gene expression in HL60 granulocytoids and human polymorphonuclear leukocytes exposed to *Candida albicans*. *Infect Immun* **2004**;72:414–29.
  28. Nawa T, Nawa MT, Adachi MT, et al. Expression of transcriptional repressor ATF3/LRF1 in human atherosclerosis: colocalization and possible involvement in cell death of vascular endothelial cells. *Atherosclerosis* **2002**;161:281–91.
  29. Hesser BA, Liang XH, Camenisch G, et al. Down syndrome critical region protein1 (DSCR1), a novel VEGF target gene that regulates expression of inflammatory markers on activated endothelial cells. *Blood* **2004**;104:149–58.
  30. Fong CW, Zhang Y, Neo SY, Lin SC. Specific induction of RGS16 (regulator of G-protein signalling 16) mRNA by protein kinase C in CEM leukaemia cells is mediated via tumour necrosis factor  $\alpha$  in a calcium-sensitive manner. *Biochem J* **2000**;352:747–53.
  31. Chen B, Shi Y, Smith JD, Choi D, Geiger JD, Mule JJ. The role of tumor necrosis factor  $\alpha$  in modulating the quantity of peripheral blood-derived, cytokine-driven human dendritic cells and its role in enhancing the quality of dendritic cell function in presenting soluble antigens to CD4<sup>+</sup> T cells in vitro. *Blood* **1998**;91:4652–61.
  32. Lechmann M, Krooshoop DJ, Dudziak D, et al. The extracellular domain of CD83 inhibits dendritic cell-mediated T cell stimulation and binds to a ligand on dendritic cells. *J Exp Med* **2001**;194:1813–21.
  33. Wisniewski HG, Hua JC, Poppers DM, Naime D, Vilcek J, Cronstein BN. TNF/IL-1-inducible protein TSG-6 potentiates plasmin inhibition by inter- $\alpha$ -inhibitor and exerts a strong anti-inflammatory effect in vivo. *J Immunol* **1996**;156:1609–15.
  34. Traynor TR, Kuziel WA, Toews GB, Huffnagle GB. CCR2 expression determines T1 versus T2 polarization during pulmonary *Cryptococcus neoformans* infection. *J Immunol* **2000**;164:2021–7.
  35. Ritter U, Meissner A, Ott J, Korner H. Analysis of the maturation process of dendritic cells deficient for TNF and lymphotoxin-alpha reveals an essential role for TNF. *J Leukoc Biol* **2003**;74:216–22.
  36. Gauss KA, Bungler PL, Larson TC, Young CJ, Nelson-Overton LK, Siemsen DW, Quinn MT. Identification of a novel tumor necrosis factor  $\alpha$ -responsive region in the *NCF2* promoter. *J Leukoc Biol* **2005**;77:267–78.
  37. King AG, Johanson K, Frey CL, et al. Identification of unique truncated KC/GRO $\beta$  chemokines with potent hematopoietic and anti-infective activities. *J Immunol* **2000**;164:3774–82.
  38. Means TK, Hayashi F, Smith KD, Aderem A, Luster AD. The Toll-like receptor 5 stimulus bacterial flagellin induces maturation and chemokine production in human dendritic cells. *J Immunol* **2003**;170:5165–75.
  39. Filler SG, Pfunder AS, Spellberg BJ, Spellberg JP, Edwards JE Jr. *Candida albicans* stimulates cytokine production and leukocyte adhesion molecule expression by endothelial cells. *Infect Immun* **1996**;64:2609–17.
  40. Moratz C, Hayman JR, Gu H, Kehrl JH. Abnormal B-cell responses to chemokines, disturbed plasma cell localization, and distorted immune tissue architecture in *Rgs1*<sup>-/-</sup> mice. *Mol Cell Biol* **2004**;24:5767–75.
  41. Shi GX, Harrison K, Han SB, Moratz C, Kehrl JH. Toll-like receptor signaling alters the expression of regulator of G protein signaling proteins in dendritic cells: implications for G protein-coupled receptor signaling. *J Immunol* **2004**;172:5175–84.
  42. Mittelstadt PR, Ashwell JD. Cyclosporin A-sensitive transcription factor Egr-3 regulates Fas ligand expression. *Mol Cell Biol* **1998**;18:3744–51.
  43. Droin NM, Pinkoski MJ, Dejardin E, Green DR. Egr family members regulate nonlymphoid expression of Fas ligand, TRAIL, and tumor necrosis factor during immune responses. *Mol Cell Biol* **2003**;23:7638–47.
  44. Fernandez Pujol B, Lucibello FC, Zuzarte M, Lutjens P, Muller R, Havemann K. Dendritic cells derived from peripheral monocytes express endothelial markers and in the presence of angiogenic growth factors differentiate into endothelial-like cells. *Eur J Cell Biol* **2001**;80:99–110.
  45. Li AL, Li HY, Jin BF, et al. A novel eIF5A complex functions as a regulator of p53 and p53-dependent apoptosis. *J Biol Chem* **2004**;279:49251–8.
